# Supplementary material for: Soil salinity limits plant shade-avoidance
Source: bioRxiv or medRxiv preprint supplement (doi:10.1101/289124), 2019-03-14
Supplement: Supplementary file [file 289124-1.pdf]

Supplementary tables

Table S1. Experimental organisms

| Experimental organisms                                       | Source                       | Identifier             |
|--------------------------------------------------------------|------------------------------|------------------------|
| Col-0                                                        | n/a                          | n/a                    |
| Ws                                                           | n/a                          | n/a                    |
| Ler                                                          | n/a                          | n/a                    |
| <i>pif4-101</i>                                              | (1)                          | n/a                    |
| <i>pif5 (pil6-1)</i>                                         | (2)                          | n/a                    |
| <i>pif7-1</i>                                                | (3)                          | n/a                    |
| <i>pif4-101/pif5 (aka pil6-1)</i>                            | (1)                          | n/a                    |
| <i>pif4-101/pif5 (aka pil6-1)/ pif7-1</i>                    | (4)                          | n/a                    |
| <i>abaQ (pyr1-1/pyl1-1/pyl2-1/pyl4-1)</i>                    | (5)                          | n/a                    |
| <i>snrk2.2/snrk2.3</i>                                       | (6)                          | n/a                    |
| <i>arebQ (areb1/ areb2/ abf3/ abf1-1)</i>                    | (7)                          | n/a                    |
| <i>abi5-1</i>                                                | (8)                          | n/a                    |
| <i>gsk3-triple (bin2-3bil1-1bil2-1)</i>                      | (9)                          | n/a                    |
| <i>bsk5</i>                                                  | NASC (characterised in (10)) | SALK_051739C / N679661 |
| <i>aba2-1</i>                                                | (11)                         | n/a                    |
| <i>aba3-1</i>                                                | (11)                         | n/a                    |
| <i>della global (gai-t6/ rga-t2/ rgl1-1/ rgl2-1/ rgl3-4)</i> | (12)                         | n/a                    |
| <i>rem4.1-1</i>                                              | NASC (characterised in (13)) | SALK_063269C /N662714  |
| <i>rem4.2-1</i>                                              | NASC (characterised in (13)) | SALK_119462 /N619462   |
| <i>rem4.1-1/ rem2.4-1</i>                                    | (13)                         | n/a                    |
| <i>pPIL1:LUC</i>                                             | (14)                         | n/a                    |
| <i>pIAA19:LUC</i>                                            | New line                     | n/a                    |
| <i>pDR5V2:GUS</i>                                            | New line                     | n/a                    |
| Tomato- <i>S. lycopersicum</i> var. "MoneyMaker"             | Intratuin NL                 | EAN# 8717263349600     |
| Tobacco- <i>N. benthamiana</i>                               | n/a                          | n/a                    |

1. S. Lorrain, T. Allen, P. Duek, G. Whitelam, C. Fankhauser, *Plant J.* **53**, 312–323 (2008).
2. T. Fujimori, T. Yamashino, T. Kato, T. Mizuno, *Plant Cell Physiol.* **45**, 1078–1086 (2004).
3. P. Leivar *et al.*, *Plant Cell.* **20**, 337–352 (2008).
4. M. de Wit, K. Ljung, C. Fankhauser, *New Phytol.* **208**, 198–209 (2015).
5. S. Park *et al.*, *Science (80- )*. **324**, 1068–1071 (2009).
6. H. Fujii, P. E. Verslues, J.-K. Zhu, *Plant Cell.* **19**, 485–494 (2007).
7. T. Yoshida *et al.*, *Plant, Cell Environ.* **38**, 35–49 (2015).
8. R. Finkelstein, *Plant J.* **5**, 765–771 (1994).
9. Z. Yan, J. Zhao, P. Peng, R. Chihara, J. Li, *Plant Physiol.* **150**, 710–721 (2009).
10. Z. Y. Li *et al.*, *Biochem. Biophys. Res. Commun.* **426**, 522–527 (2012).
11. K. Léon-Kloosterziel *et al.*, *Plant J.* **10**, 655–661 (1996).
12. M. Koini *et al.*, *Curr. Biol.* **19**, 408–413 (2009).
13. S. Son, C. Oh, C. An, *Plant Pathol. J.* **30**, 269–278 (2014).
14. L. Li *et al.*, *Mol. Plant.* **7**, 1582–1585 (2014).

Table S2- Oligonucleotides

| <b>Cloning</b>                  |                                      |                                         |
|---------------------------------|--------------------------------------|-----------------------------------------|
| <b>Fragment:</b>                | <b>Forward</b>                       | <b>Reverse</b>                          |
| <i>IAA19</i><br>promoter        | CACCGCGTCCGCTAAACACTCGTGC            | CCTCTCACAATTTGATACAATTATGAAATGA<br>GAAC |
| <i>NotI-GUS-</i><br><i>SacI</i> | TTTTGCGGCCGCATGGTCCGTCCTGTAG<br>AAAC | CCCCGAGCTCTCATTGTTTGCCTCCCTG            |
| <b>gPCR</b>                     |                                      |                                         |
| <b>Gene:</b>                    | <b>Forward</b>                       | <b>Reverse</b>                          |
| <i>AT1613320</i>                | GTAGGACCGGAGCCAACACTAG               | ACAGGGAAGAATGTGCTGGA                    |
| <i>BSK5</i>                     | CGAGCTGCTACTTGTGGATT                 | AGGCCAAGCGGATCTATTGA                    |
